# Supplementary material for: Fibroblast Upregulation of Vitamin D Receptor Represents a Self-Protective Response to Limit Fibroblast Proliferation and Activation during Pulmonary Fibrosis
Source: MDPI journal article supplement (doi:10.3390/antiox12081634), 2023-08-18
Supplement: s1 [file s1]

# Fibroblast upregulation of vitamin D receptor represents a self-protective response to limit fibroblast proliferation and activation during pulmonary fibrosis

Juan Wei<sup>1,3†</sup>, Juanhui Zhan<sup>1†</sup>, Hui Ji<sup>1</sup>, Yitong Xu<sup>1</sup>, Qingfeng Xu<sup>1</sup>, Xiaoyan Zhu<sup>2\*</sup>, and Yujian Liu<sup>1\*</sup>

Table S1 Primer sequences used in the real-time quantitative PCR

| Gene names     | the gene accession number | Forward (5'-3')               | Reverse (5'-3')             |
|----------------|---------------------------|-------------------------------|-----------------------------|
| VDR            | NM_009504.4               | CTCCTCGATGCCCCACCACAAGACCTACG | GTGGGGCAGCATGGAGAGCGGAGACAG |
| Ki67           | NM_001081117.2            | ACCGTGGAGTAGTTTATCTGGG        | TGTTTCCAGTCCGCTTACTTCT      |
| Ccne1          | NM_007633.2               | CTTATGGTGTCTCGCTGCTTCTG       | GCTCGCTGCTCTGCTTCTTACTG     |
| Ccnb1          | NM_172301.3               | CTGACCCAAACCTCTGTAGTG         | CCTGTATTAGCCAGTCAATGAGG     |
| PCNA           | NM_011045.2               | TTTGAGGCACGCCTGATCC           | GGAGACGTGAGACGAGTCCAT       |
| Cdc25b         | NM_023117.4               | GACAGCTGGAGGAAAACCTGA         | ATCACTCTCCAGGATGTCCA        |
| Fibronectin    | NM_010233.2               | CAACAACCGGAATTACACC           | GGTCTCGGAGCTGGGAGTAG        |
| Collagen-1     | NM_007742.4               | GACATGTTTCTGCTTTGTGGACCTC     | GGGACCCTTAGGCCATTGTGTA      |
| $\alpha$ -SMA  | NM_007392.3               | CTCCTCAGGACGACAATCGACA        | CCTTTCCACAGGGCTTTGTTTG      |
| $\beta$ -actin | NM_007393.5               | TGGAATCCTGTGGCATCCATGAAAC     | TAAAACGCAGCTCAGTAACAGTCCG   |

Table S2 8 datasets of lung tissue from healthy control and IPF

| GEO dataset | Platform                                                                       | Group (n)          | Gene.<br>symbol | ID             | llogFCl | P.Value | References                                                          |
|-------------|--------------------------------------------------------------------------------|--------------------|-----------------|----------------|---------|---------|---------------------------------------------------------------------|
| GSE21369    | GPL570                                                                         | Normal (6)         | VDR             | 204254_s_at    | 0.249   | 0.487   | BMC Med Genomics 2011 Jan; 4: 8.PMID: 21241464                      |
|             | [HG-U133_Plus_2] Affymetrix Human Genome U133 Plus 2.0 Array                   | VS UIP/IPF<br>(11) |                 |                |         |         |                                                                     |
| GSE53845    | GPL6480                                                                        | Normal (8)         | VDR             | A_23_P162589   | 0.327   | 0.091   | Thorax 2015 Jan; 70(1): 48-56.PMID: 25217476                        |
|             | Agilent-014850 Whole Human Genome Microarray 4x44K G4112F (Probe Name version) | VS IPF (40)        |                 |                |         |         |                                                                     |
| GSE38958    | GPL5175                                                                        | Normal (45)        | VDR             | 3452818        | 0.103   | 0.101   | Thorax 2015 Dec; 70(12): 1138-48.<br>PMID: 26286721,                |
|             | [HuEx-1_0-st] Affymetrix Human Exon 1.0 ST Array [transcript (gene) version]   | VS IPF (70)        |                 |                |         |         | Am J Respir Crit Care Med 2014 Jun; 189(11): 1402-15.PMID: 24779708 |
| GSE110147   | GPL6244                                                                        | Normal (11)        | VDR             | 7962689        | 0.391   | <0.001  | Respir Res 2018 Aug; 19(1): 153.<br>PMID: 30111332                  |
|             | [HuGene-1_0-st] Affymetrix Human Gene 1.0 ST Array [transcript (gene) version] | VS IPF (20)        |                 |                |         |         |                                                                     |
| GSE2052     | GPL1739                                                                        | Normal (11)        | VDR             | 50,28          | 0.131   | 0.479   | J Exp Med 2006 Dec; 203(13): 2895-906. PMID: 17178917,              |
|             | Amersham Biosciences CodeLink Uniset Human I Bioarray                          | VS IPF (13)        |                 |                |         |         | PLoS Med 2005 Sep; 2(9): e251.<br>PMID: 16128620,                   |
| GSE101286   | GPL6947                                                                        | Normal (3)         | VDR             | ILMN_1666203   | 0.263   | 0.784   | Am J Pathol 2008 Mar; 172(3): 583-91.PMID: 18245812                 |
|             | Illumina HumanHT-12 V3.0 expression beadchip                                   | VS IPF (7)         |                 |                |         |         | BMC Med Genet 2017 Aug; 18(1): 88.PMID: 28821283                    |
| GSE72073    | GPL17586                                                                       | Normal (3)         | VDR             | TC12001439.hg. | 0.070   | 0.567   | Respir Res 2015 Oct; 16: 124.                                       |
|             | [HTA-2_0] Affymetrix Human Transcriptome Array 2.0 [transcript (gene) version] | VS IPF (5)         |                 | 1              |         |         | PMID: 26453058                                                      |

|          |                                                                   |             |     |           |       |       |                                               |
|----------|-------------------------------------------------------------------|-------------|-----|-----------|-------|-------|-----------------------------------------------|
| GSE48149 | GPL16221                                                          | Normal (9)  | VDR | ILMN_8252 | 0.170 | 0.196 | Arthritis Rheum 2011 Mar; 63(3): 783-94.PMID: |
|          | Illumina HumanRef-8 v3.0 expression beadchip (Search Key version) | VS IPF (13) |     |           |       |       | 21360508,                                     |
|          |                                                                   |             |     |           |       |       | Front Immunol 2020; 11: 383.                  |
|          |                                                                   |             |     |           |       |       | PMID: 32210969                                |

**Table S3 12 datasets of lung tissue from healthy control and BLM-induced mouse**

| GEO dataset | Platform                                                                         | Group(n)                       | Gene.<br>symbol | ID           | llogFC | P.Value | References                    |
|-------------|----------------------------------------------------------------------------------|--------------------------------|-----------------|--------------|--------|---------|-------------------------------|
| GSE103511   | GPL6887                                                                          | Control (6) VS BLM (6) 2 weeks | VDR             | ILMN_2864062 | 0.135  | 0.816   | Sci Rep 2018 Jan; 8(1): 1927. |
|             | Illumina MouseWG-6 v2.0 expression beadchip                                      |                                |                 |              |        |         | PMID: 29386571                |
| GSE94522    | GPL10787                                                                         | Control (3) VS BLM (3) 2 weeks | VDR             | A_52_P334562 | 0.143  | 0.507   |                               |
|             | Agilent-028005 SurePrint G3 Mouse GE 8x60K Microarray (Probe<br>Name version)    |                                |                 |              |        |         |                               |
| GSE77326    | GPL15887                                                                         | Control (6) VS BLM (6) 3 weeks | VDR             | BC006716     | 0.102  | 0.645   |                               |
|             | Nimble Gen Mouse gene expression array [100718_MM9_EXP] (gene-<br>level version) |                                |                 |              |        |         |                               |

|          |                                                                                            |                                 |     |              |       |       |                                                                           |
|----------|--------------------------------------------------------------------------------------------|---------------------------------|-----|--------------|-------|-------|---------------------------------------------------------------------------|
| GSE43695 | GPL6246<br>[MoGene-1_0-st] Affymetrix Mouse Gene 1.0 ST Array [transcript (gene) version]  | Control (3) VS BLM (3) 5 days   | VDR | 10432032     | 0.154 | 0.334 | BMC Genomics 2013 Jun; 14:381.<br>PMID: 23758685                          |
| GSE25640 | GPL1261<br>[Mouse430_2] Affymetrix Mouse Genome 430 2.0 Array                              | Control (3) VS BLM (3) 21 days  | VDR | 1418175_at   | 0.245 | 0.104 | J Immunol 2011 Jul; 187(1): 450-61.<br>PMID: 21602491                     |
| GSE16846 | GPL339<br>[MOE430A] Affymetrix Mouse Expression 430A Array                                 | Control (3) VS BLM (3) 14 days  | VDR | 1418175_at   | 0.154 | 0.244 | J Clin Invest 2009 Sep; 119(9): 2550-63.<br>PMID: 19652365                |
| GSE37635 | GPL6885<br>Illumina Mouse Ref-8 v2.0 expression beadchip                                   | Control (7) VS BLM (6) 1 week   | VDR | ILMN_2445166 | 0.26  | 0.308 | Matrix Biol 2013 Oct-Nov; 32(7-8): 424-31.                                |
|          |                                                                                            | Control (7) VS BLM (6) 2 weeks  |     | ILMN_2445165 | 0.195 | 0.423 | PMID: 23648810                                                            |
|          |                                                                                            | Control (7) VS BLM (6) 3 weeks  |     | ILMN_2748317 | 0.042 | 0.846 |                                                                           |
|          |                                                                                            | Control (7) VS BLM (6) 4 weeks  |     | ILMN_2445165 | 0.515 | 0.101 |                                                                           |
|          |                                                                                            | Control (7) VS BLM (6) 5 weeks  |     | ILMN_2445166 | 0.407 | 0.094 |                                                                           |
| GSE40151 | GPL1261<br>[Mouse430_2] Affymetrix Mouse Genome 430 2.0 Array                              | Control (8) VS BLM (8) 14 days  | VDR | 1418176_at   | 0.053 | 0.337 | PLoS One 2013; 8(4): e59348.                                              |
|          |                                                                                            | Control (8) VS BLM (8) 21 days  |     |              | 0.071 | 0.488 | PMID: 23565148                                                            |
|          |                                                                                            | Control (8) VS BLM (8) 28 days  |     |              | 0.017 | 0.774 |                                                                           |
|          |                                                                                            | Control (8) VS BLM (8) 35 days  |     |              | 0.107 | 0.071 |                                                                           |
| GSE42301 | GPL2894<br>GE Healthcare/Amersham Biosciences CodeLink™ UniSet Mouse 20K I Bioarray        | Control (3) VS BLM (3) 7 days   | VDR | 30068        | 0.062 | 0.867 | Am J Physiol Lung Cell Mol Physiol 2013<br>May; 304(9): L593-601.         |
|          |                                                                                            | Control (3) VS BLM (3) 1 months |     |              | 0.302 | 0.439 | PMID: 23457188                                                            |
|          |                                                                                            | Control (3) VS BLM (3) 2 months |     |              | 0.292 | 0.435 |                                                                           |
|          |                                                                                            | Control (3) VS BLM (3) 3 months |     |              | 0.250 | 0.465 |                                                                           |
|          |                                                                                            | Control (3) VS BLM (3) 4 months |     |              | 0.045 | 0.922 |                                                                           |
| GSE97825 | GPL13912<br>Agilent-028005 SurePrint G3 Mouse GE 8x60K Microarray (Feature Number version) | Control (3) VS BLM (5) 4 days   | VDR | 61450        | 0.145 | 0.117 | Am J Respir Crit Care Med 2019 Jul; 200(2):<br>184-198.<br>PMID: 30964696 |

|           |                                                                                |                               |     |          |       |       |                                                      |
|-----------|--------------------------------------------------------------------------------|-------------------------------|-----|----------|-------|-------|------------------------------------------------------|
| GSE112827 | GPL13912                                                                       | Control (3) VS BLM (5) 4 days | VDR | 61450    | 0.157 | 0.111 | Am J Respir Crit Care Med 2019 Jul; 200(2): 184-198. |
|           | Agilent-028005 SurePrint G3 Mouse GE 8x60K Microarray (Feature Number version) |                               |     |          |       |       | PMID: 30964696                                       |
| GSE180750 | GPL16570                                                                       | Control (3) VS BLM (3)        | VDR | 17321078 | 0.112 | 0.525 |                                                      |
|           | [MoGene-2_0-st] Affymetrix Mouse Gene 2.0 ST Array [transcript (gene) version] |                               |     |          |       |       |                                                      |

---

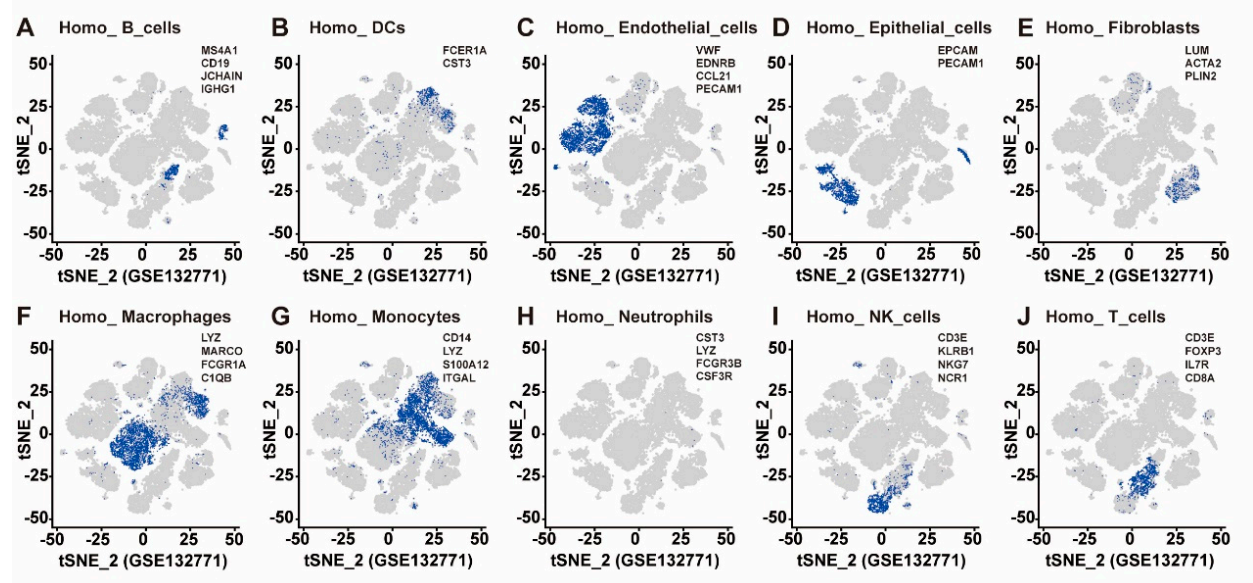

**Supplemental Fig. 1** Analysis of scRNAseq data of human lung cells shows expression levels of lineage marker genes on UMAP plots of all cells. Visualization of the lung cell clusters of a published scRNAseq data (GSE132771) was performed on a 2D map with uniform manifold approximation and projection (UMAP). Expression levels of lineage marker genes of B cells (A), dendritic cells (B), endothelial cells (C), epithelial cells (D), fibroblasts (E), macrophages (F), monocytes (G), neutrophils (H), NK cells (I), and T cells (J) were shown on UMAP plots.

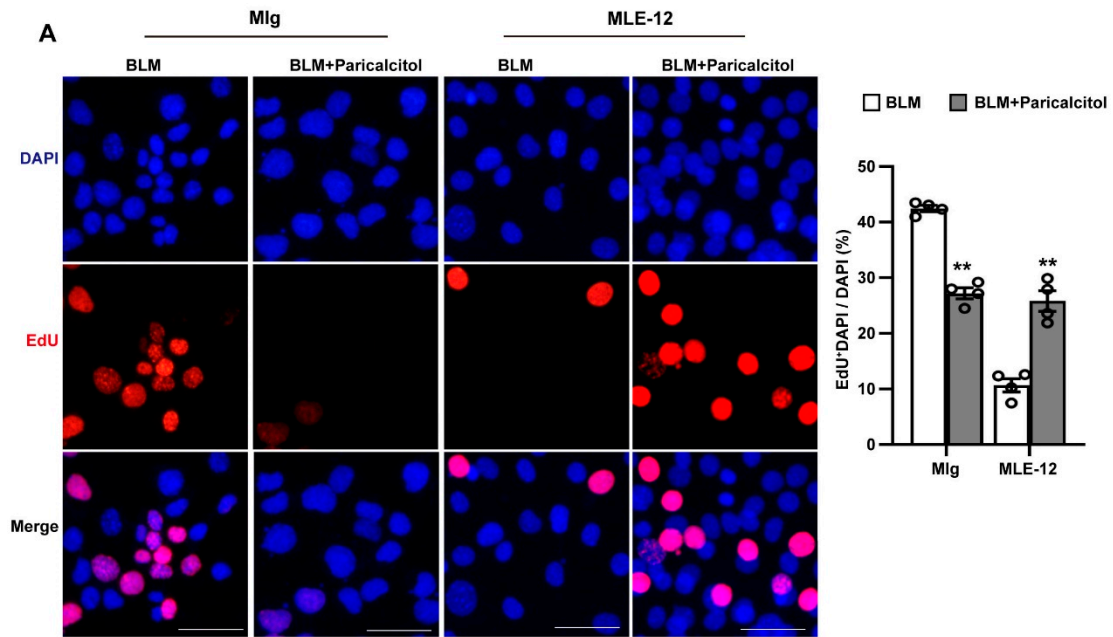

**Supplemental Fig. 2** The effects of VDR agonist on the proliferation of Mlg and MLE-12 cells in the presence of bleomycin. Mlg and MLE-12 cells were treated with bleomycin (5  $\mu$ g/ml) in the presence of vehicle or paricalcitol (2.5  $\mu$ M) for 48 hours. EdU incorporation assay was used to assess cell proliferation. The proliferative cell number (%) is shown on the right of the representative images as a ratio of the number of EdU+ cells to the total cell number. Data are expressed as means  $\pm$  SEM (n=4). \*\*  $p < 0.01$  vs BLM. BLM represents bleomycin.

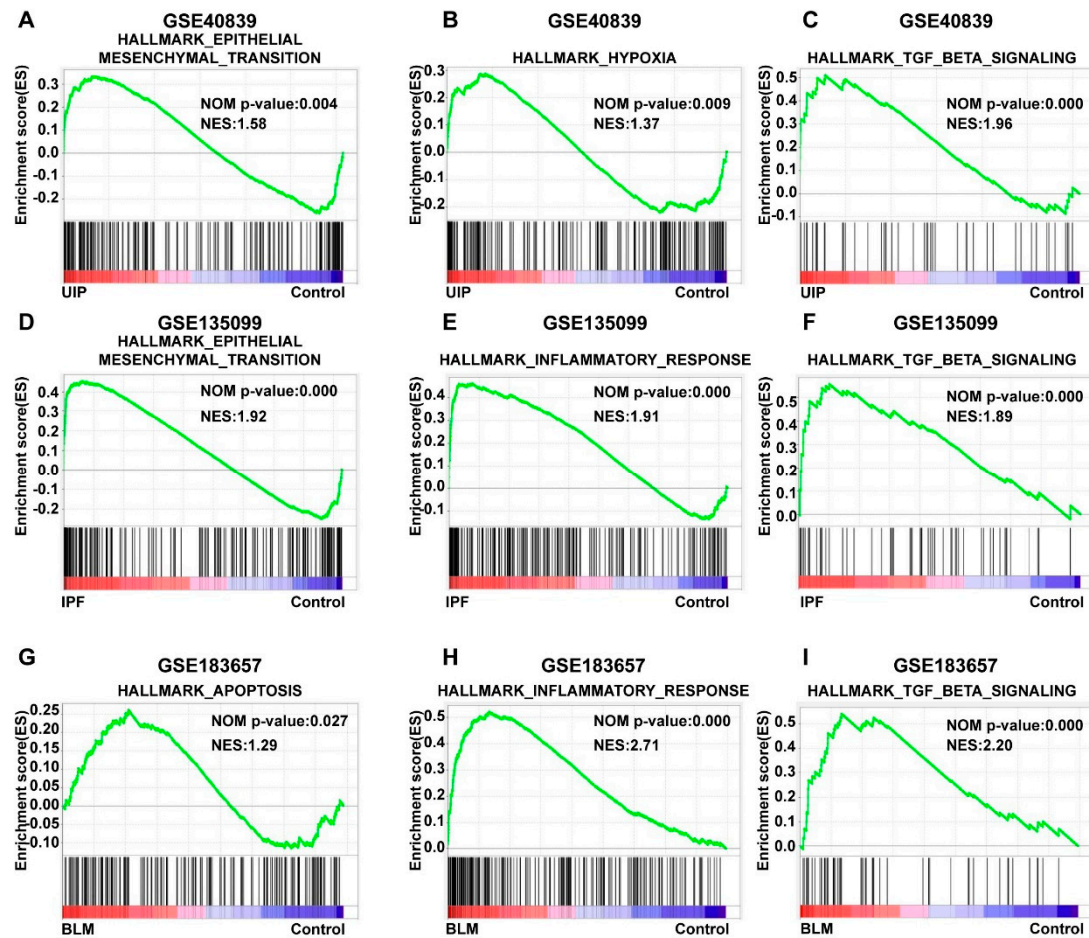

**Supplemental Fig. 3** GSEA gene sets associated with well-known fibrosis-associated pathways are enriched in fibroblasts obtained from fibrotic lungs. A-C, GSEA analysis showed that gene sets associated with epithelial mesenchymal transition (A), hypoxia (B), and the TGF- $\beta$  signaling (C) were significantly enriched in fibroblasts isolated from patients with UIP (GSE40839). D-F, GSEA analysis showed that gene sets associated with epithelial mesenchymal transition (D), inflammatory response (E), and the TGF- $\beta$  signaling (F) were significantly enriched in fibroblasts isolated from patients with IPF (GSE135099). G-I, GSEA analysis showed that gene sets associated with apoptosis (G), inflammatory response (H), and the TGF- $\beta$  signaling (I) were significantly enriched in fibroblasts isolated from bleomycin-treated mice (GSE183657).



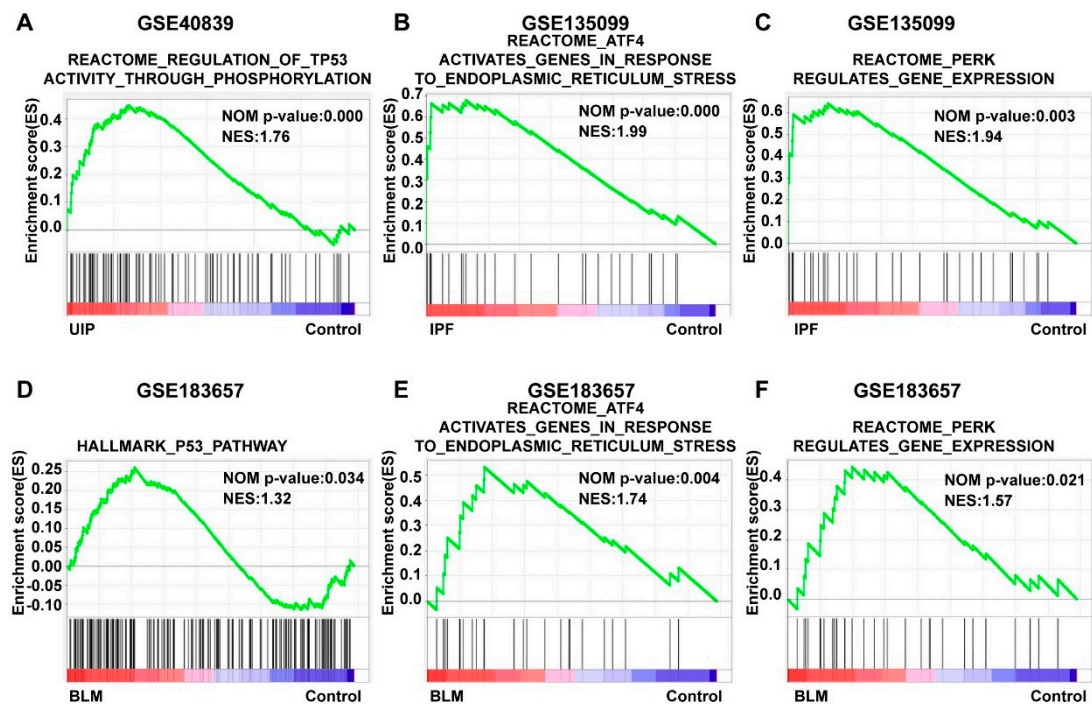

**Supplemental Fig. 4** GSEA gene sets associated with ER stress/UPR-associated pathways are enriched in fibroblasts obtained from fibrotic lungs. A, GSEA analysis showed that gene set associated with regulation of TP53 activity through phosphorylation (A) was significantly enriched in fibroblasts isolated from patients with UIP (GSE40839). B-C, GSEA analysis showed that gene sets associated with ATF4 activates genes in response to endoplasmic reticulum stress (B) and PERK regulates gene expression (C) were significantly enriched in fibroblasts isolated from patients with IPF (GSE135099). D-F, GSEA analysis showed that gene sets associated with p53 pathway (D), ATF4 activates genes in response to endoplasmic reticulum stress (E), and PERK regulates gene expression (F) were significantly enriched in fibroblasts isolated from bleomycin-treated mice (GSE183657).

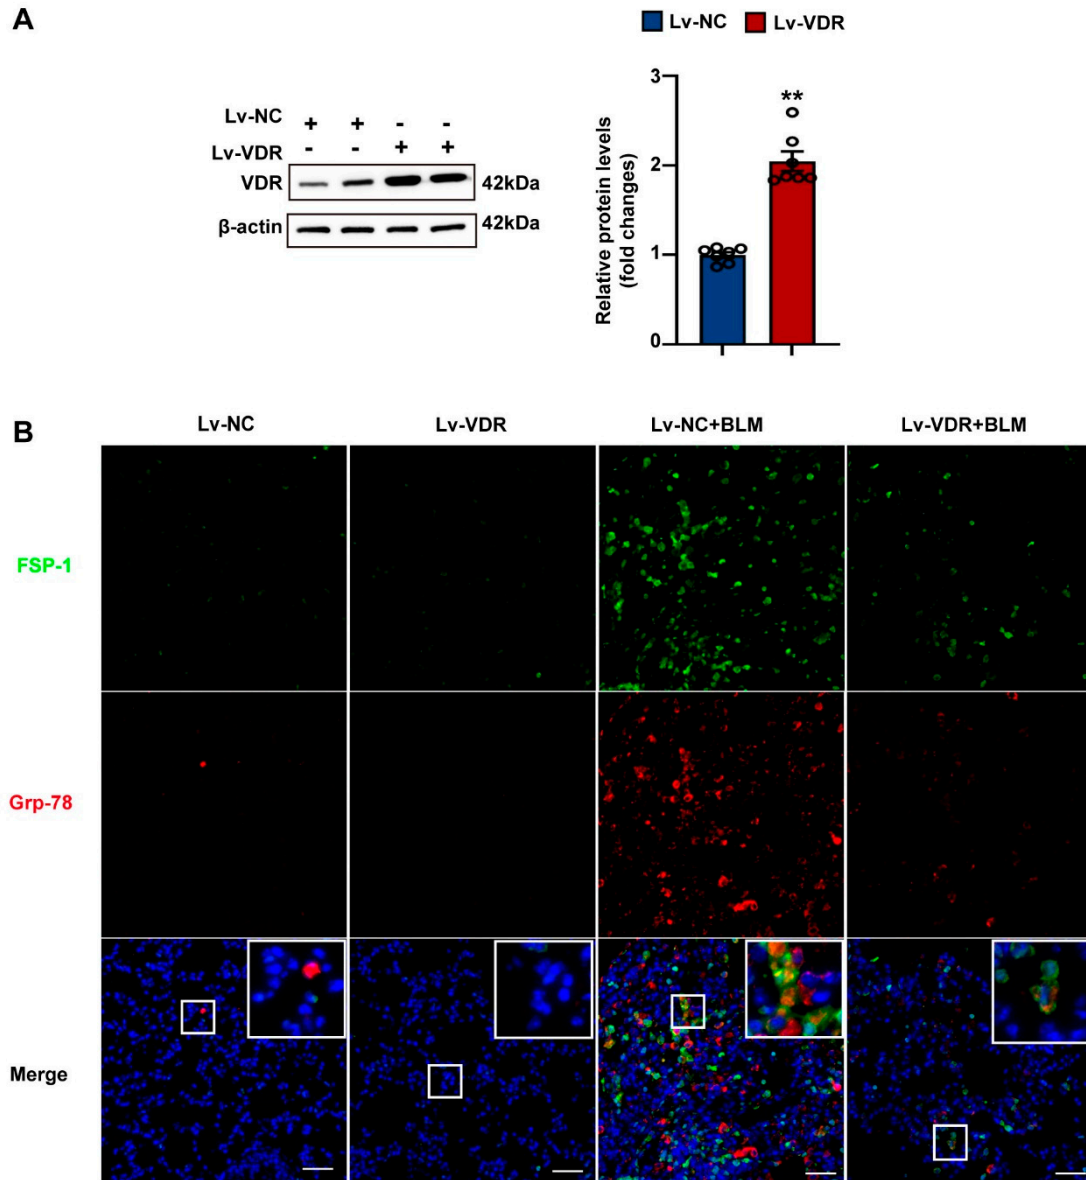

**Supplemental Fig. 5** Intrapulmonary VDR overexpression suppresses bleomycin-induced Grp78 expression in lung fibroblasts in vivo. A, Mice were intratracheally instilled with Lv-VDR or Lv-NC. Two weeks later, lung tissues were harvested to determine VDR expression by western blot analysis. Representative protein bands were presented on the left of the histograms. B, Mice were randomly divided into four groups: Lv-NC, Lv-VDR, Lv-NC+BLM, and Lv-VDR+BLM. Lung sections were stained with fluorophore-labeled antibodies against Grp78 (Alexa Fluor 647, red) and fibroblast marker FSP-1 (Alexa Fluor 488, green). DAPI staining was used to detect nuclei (blue). Merge image represented double positive staining for FSP-1 and Grp78. Areas in white boxes were shown enlarged. Scale bars correspond to 50  $\mu$ m. BLM represents bleomycin.
